# Supplementary material for: Cytotoxicity Profiles and Neuroprotective Properties of the Novel Ifenprodil Analogues as Sigma Ligands
Source: MDPI journal article supplement (doi:10.3390/molecules28083431), 2023-04-13

## Supplementary Material

### **Cytotoxicity Profiles and Neuroprotective Properties of the Novel Ifenprodil Analogues as Sigma Ligands**

Daniele Zampieri <sup>1,\*</sup>, Antonella Calabretti <sup>1</sup>, Maurizio Romano <sup>2</sup>, Sara Fortuna <sup>3</sup>, Simona Collina <sup>4</sup>, Emanuele Amata <sup>5</sup>, Maria Dichiarà <sup>5</sup>, Agostino Marrazzo <sup>5</sup> and Maria Grazia Mamolo <sup>1</sup>

<sup>1</sup> *Department of Chemical and Pharmaceutical Sciences, University of Trieste, Via Giorgieri 1, 34127 Trieste, Italy*

<sup>2</sup> *Department of Life Sciences, University of Trieste, Via Valerio 28, 34127 Trieste, Italy*

<sup>3</sup> *Italian Institute of Technology (IIT), Via E. Melen 83, 16152 Genova, Italy*

<sup>4</sup> *Department of Drug Sciences, Medicinal Chemistry and Pharmaceutical Technology Section, University of Pavia, Viale Taramelli 6 and 12, 27100 Pavia, Italy*

<sup>5</sup> *Department of Drug and Health Sciences, University of Catania, Viale Doria 6, 95125 Catania, Italy*

\* Corresponding author; email address: [dzampieri@units.it](mailto:dzampieri@units.it) (D. Zampieri)

#### Table of contents

-Chemistry:

-<sup>1</sup>H-NMR and <sup>13</sup>C-NMR Spectra for compounds **5a–o**

-Biology:

-Cytotoxicity curves for compounds **5d**, **5e**, **5h**, **5i**, **5k** and **5o**

$^1\text{H}$ -NMR and  $^{13}\text{C}$ -NMR spectra for compound **5a** ( $\text{CDCl}_3$ )

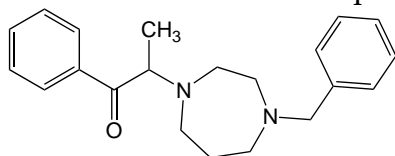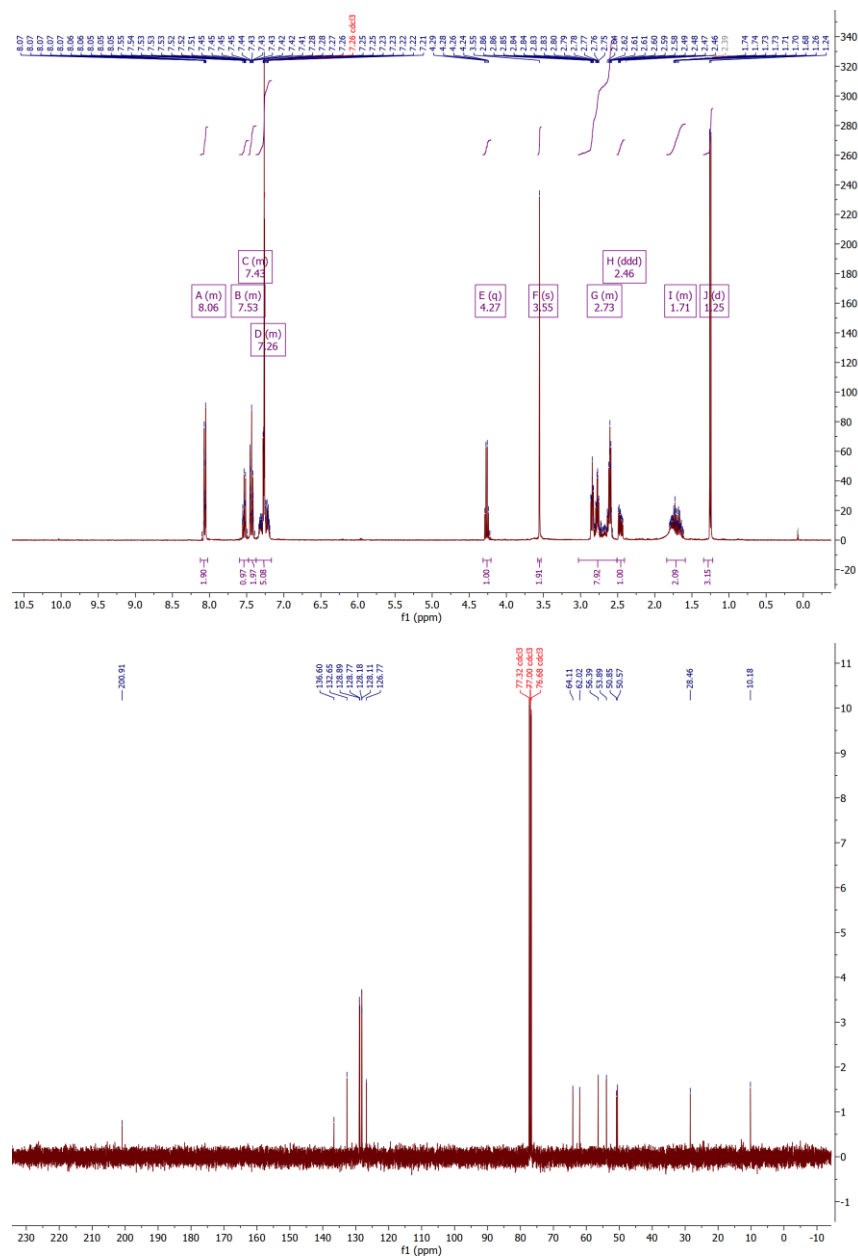

$^1\text{H}$ -NMR and  $^{13}\text{C}$ -NMR spectra for compound **5b** ( $\text{CDCl}_3$ )

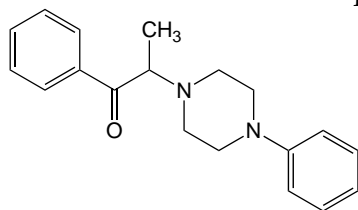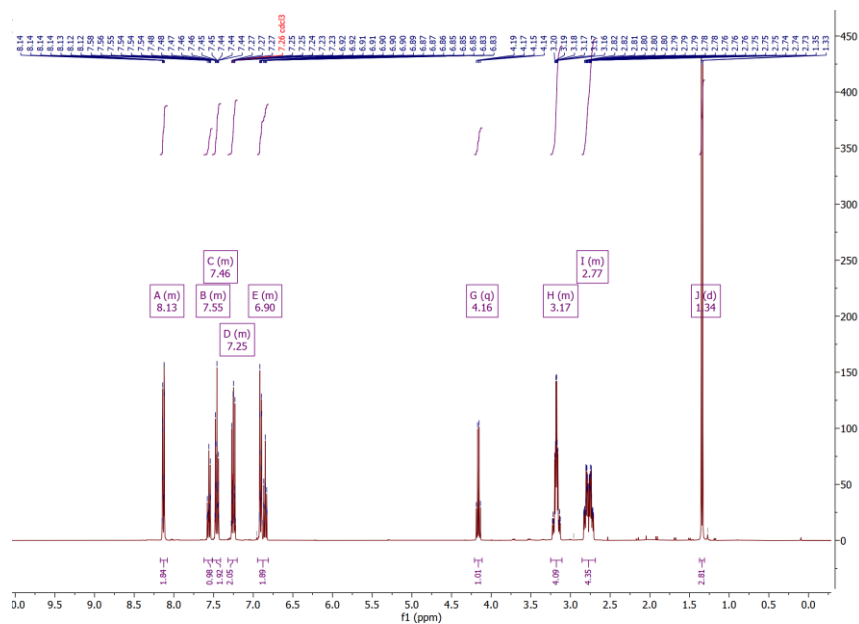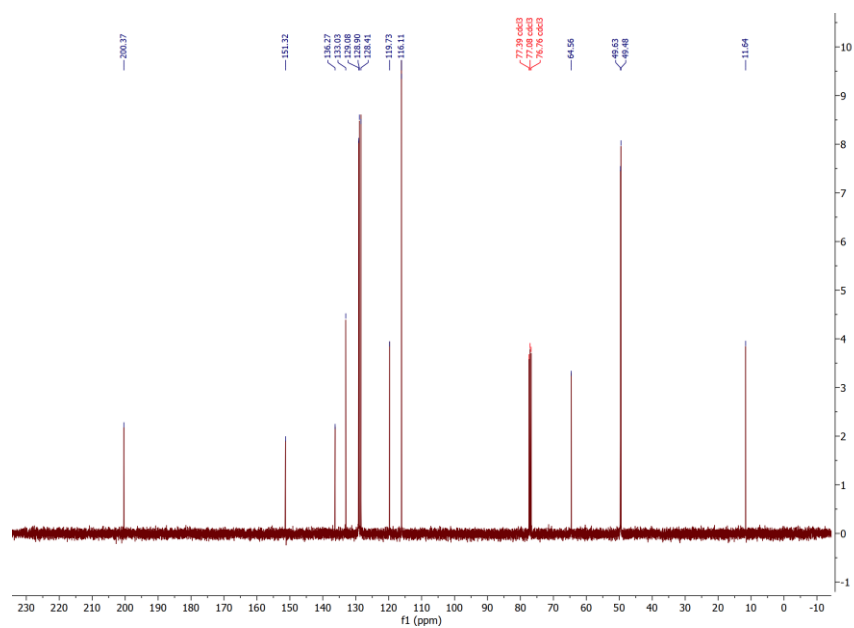

$^1\text{H}$ -NMR and  $^{13}\text{C}$ -NMR spectra for compound **5c** ( $\text{CDCl}_3$ )

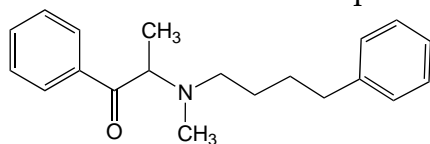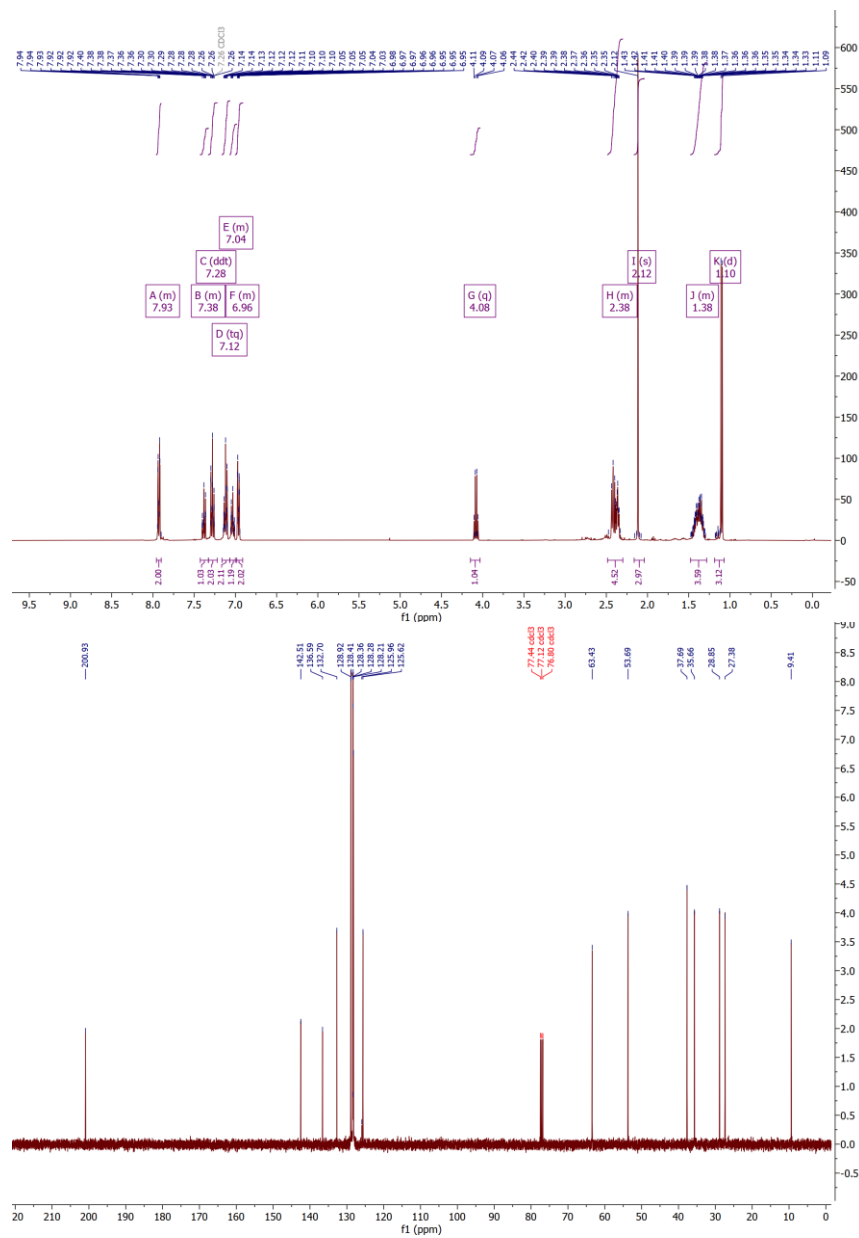

$^1\text{H}$ -NMR and  $^{13}\text{C}$ -NMR spectra for compound **5d** ( $\text{CDCl}_3$ )

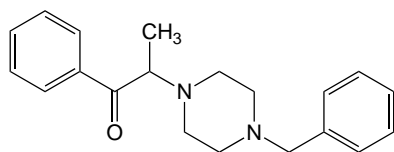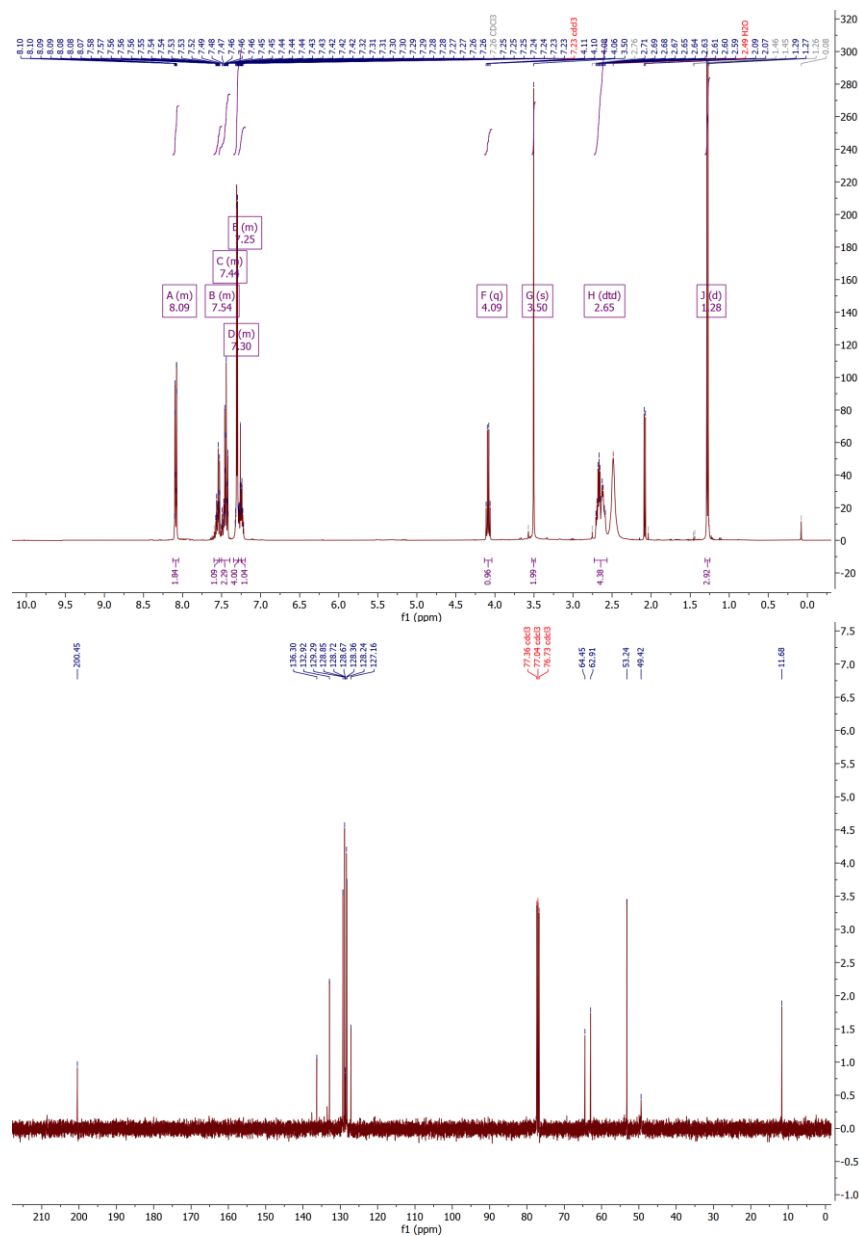

$^1\text{H}$ -NMR and  $^{13}\text{C}$ -NMR spectra for compound **5e** ( $\text{CDCl}_3$ )

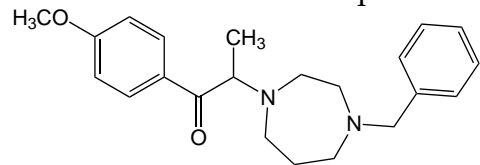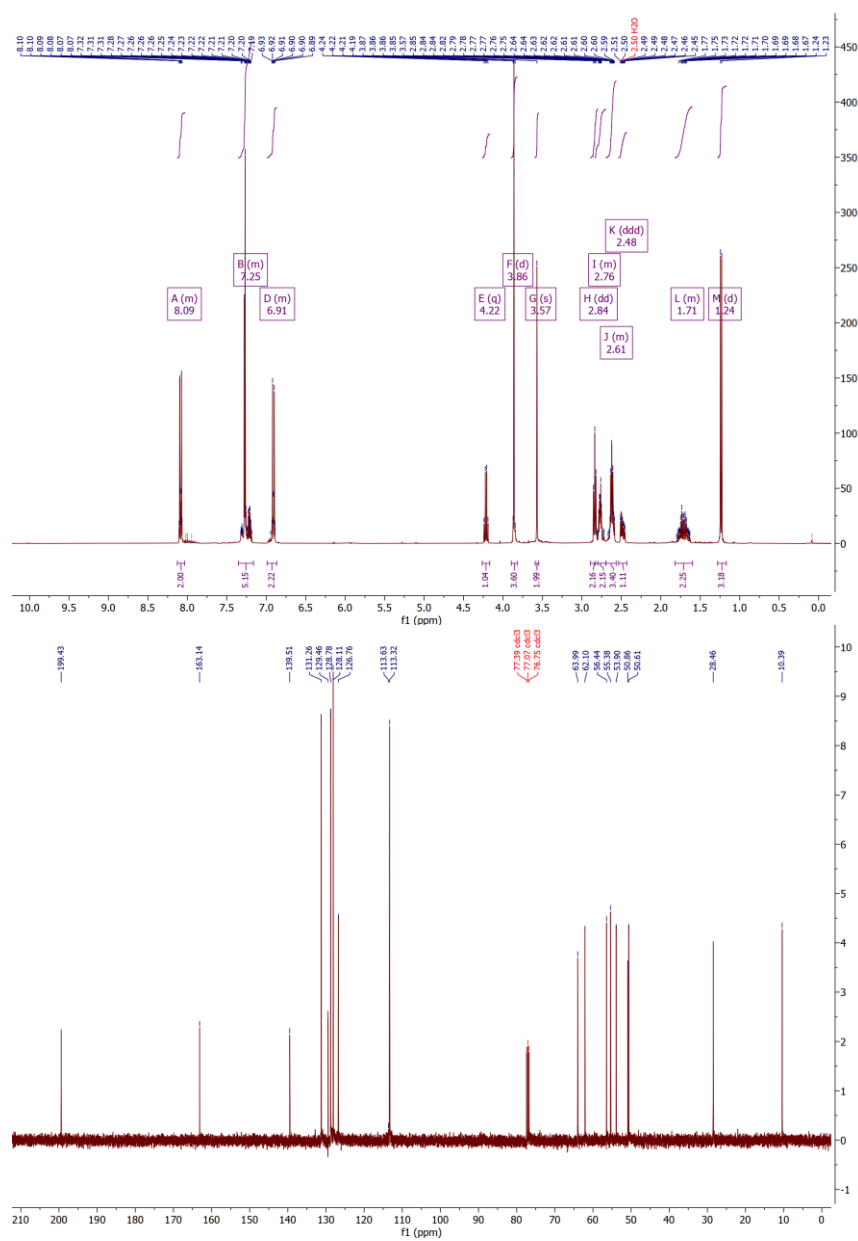

$^1\text{H}$ -NMR and  $^{13}\text{C}$ -NMR spectra for compound **5f** ( $\text{CDCl}_3$ )

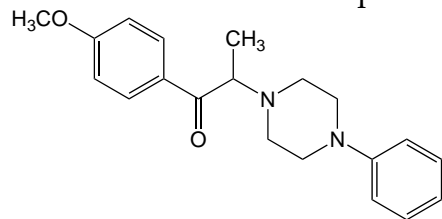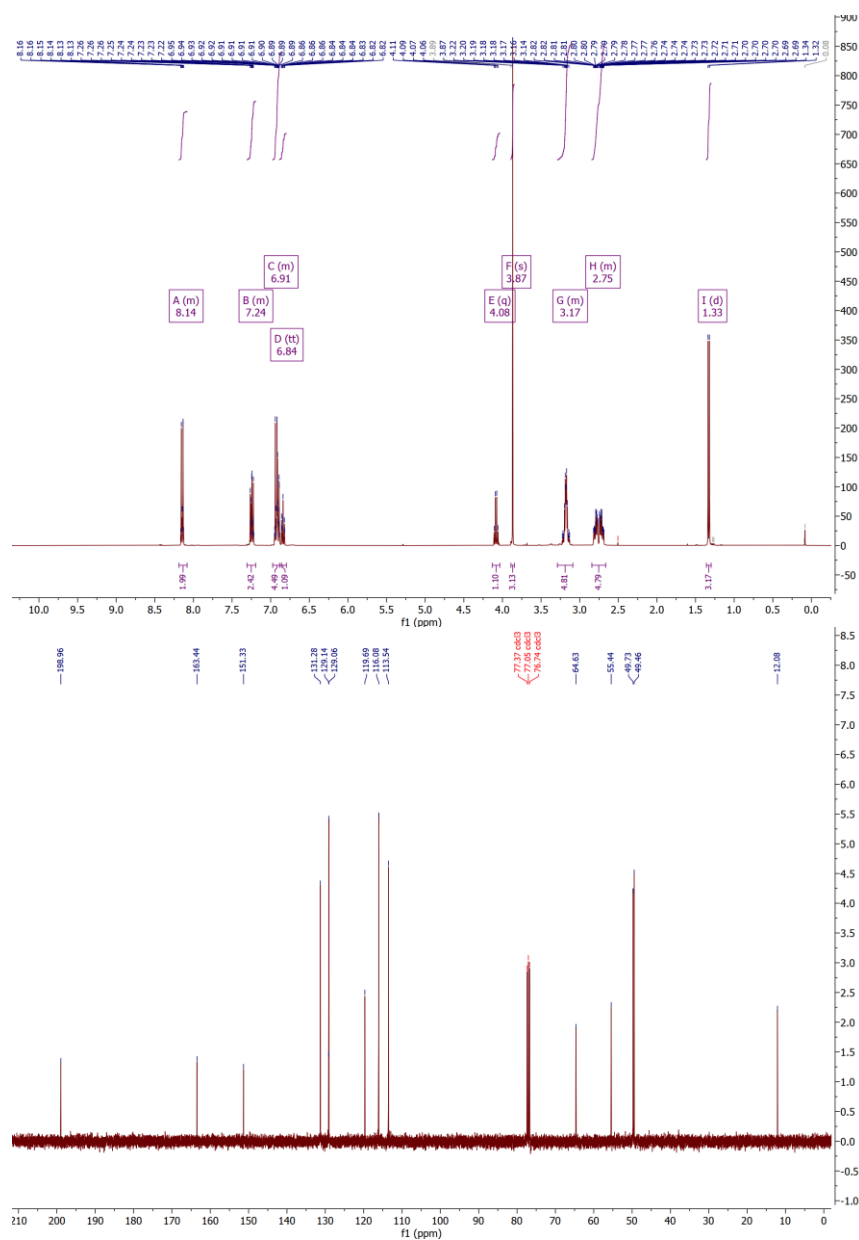

$^1\text{H}$ -NMR and  $^{13}\text{C}$ -NMR spectra for compound **5g** ( $\text{CDCl}_3$ )

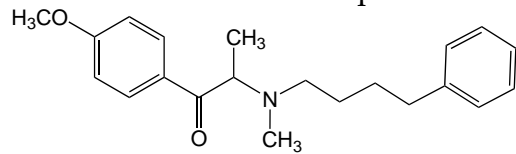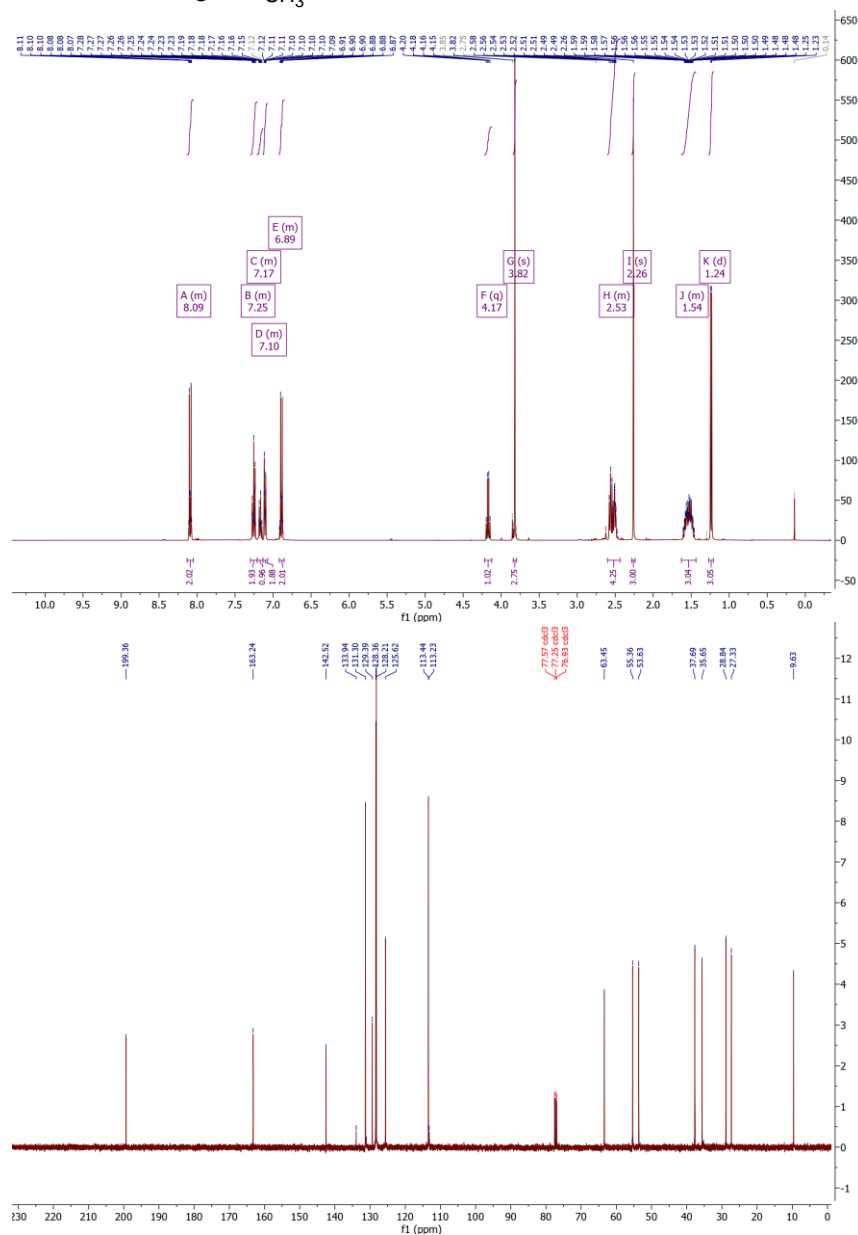



$^1\text{H}$ -NMR and  $^{13}\text{C}$ -NMR spectra for compound **5h** ( $\text{CDCl}_3$ )

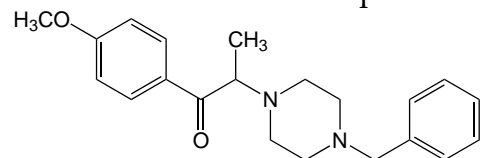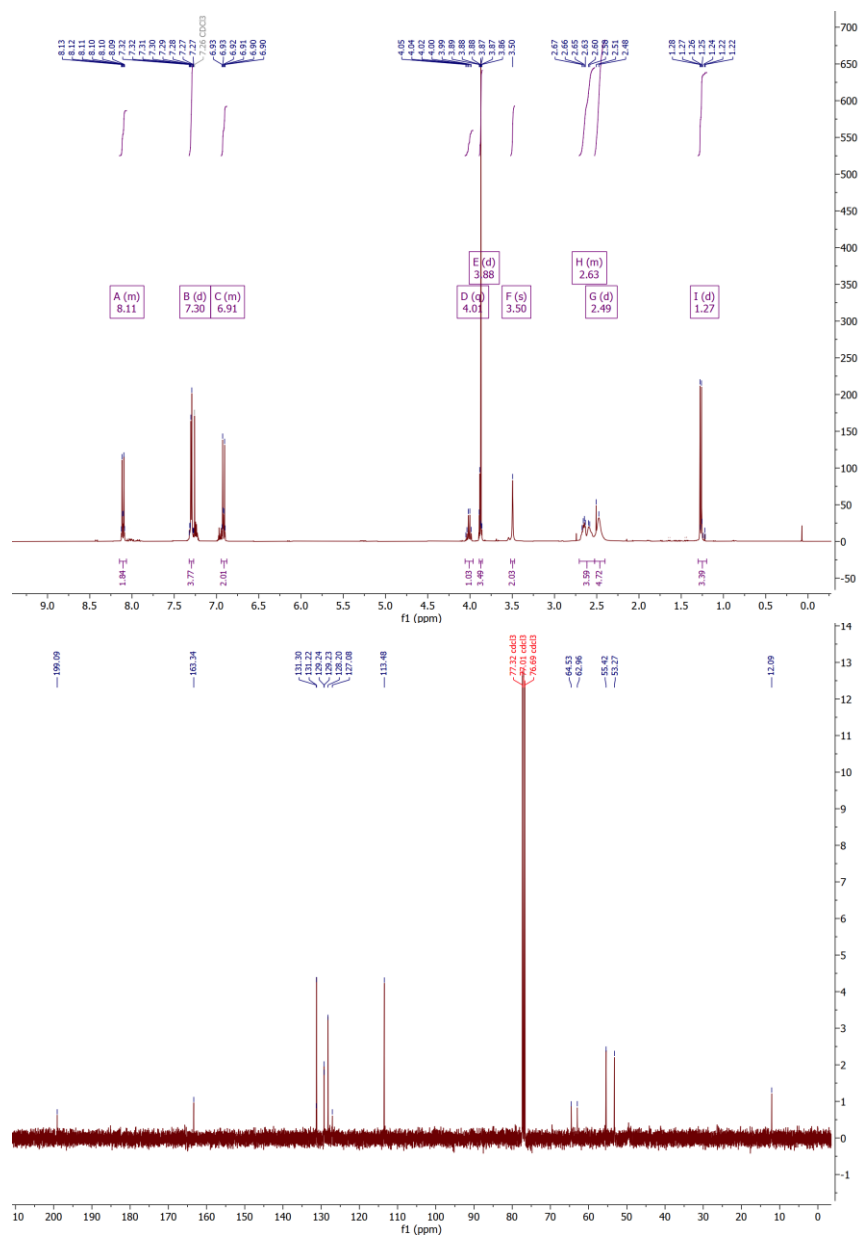

$^1\text{H}$ -NMR and  $^{13}\text{C}$ -NMR spectra for compound **5i** ( $\text{CDCl}_3$ )

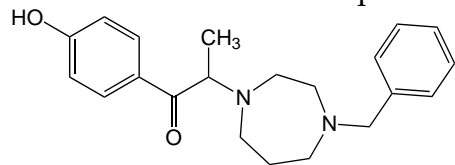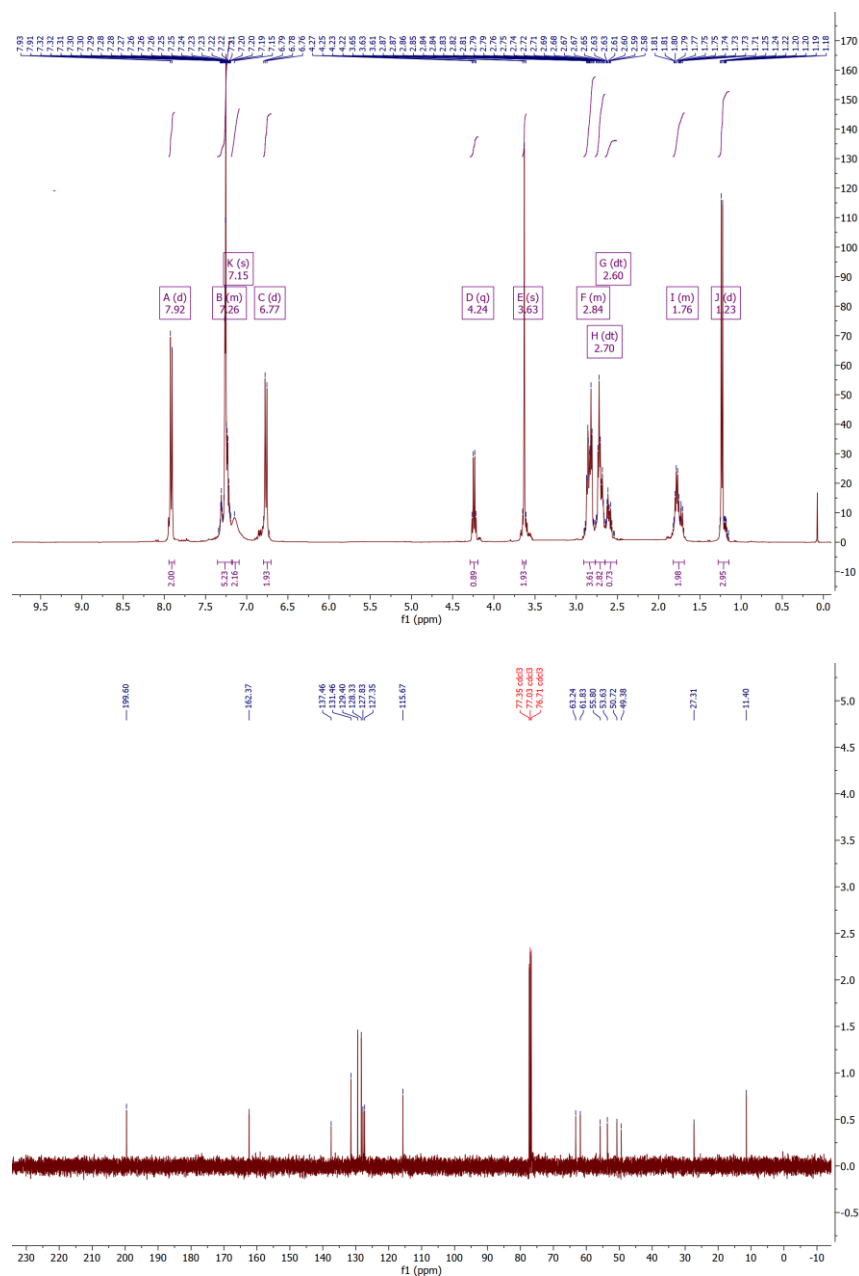

$^1\text{H}$ -NMR and  $^{13}\text{C}$ -NMR spectra for compound **5j** ( $\text{CDCl}_3$ )

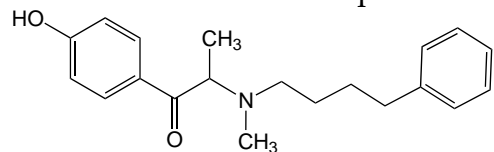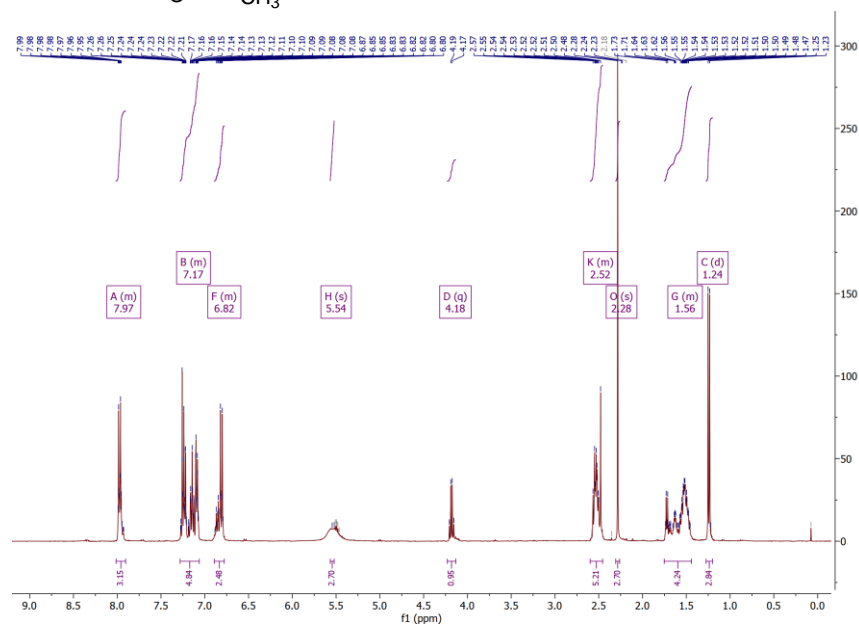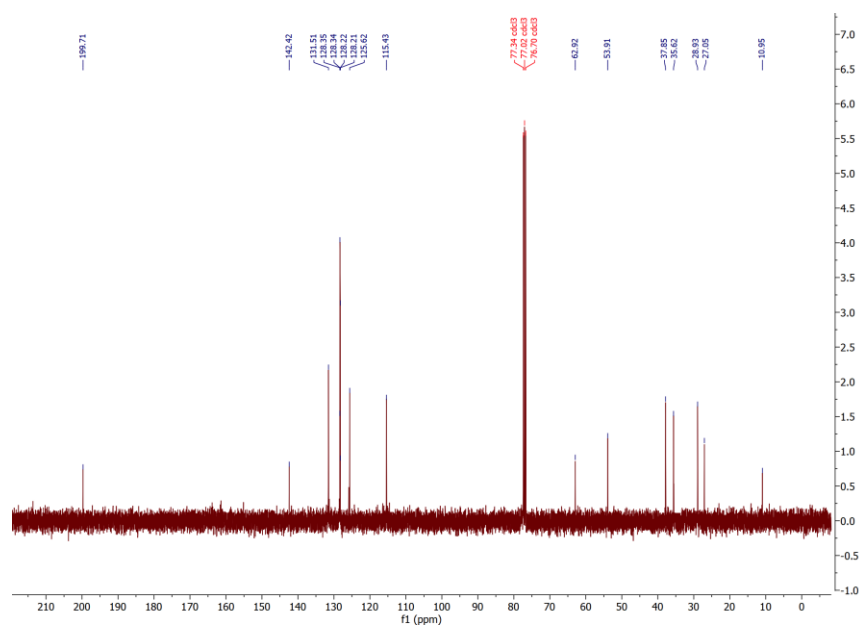

$^1\text{H}$ -NMR and  $^{13}\text{C}$ -NMR spectra for compound **5k** ( $\text{CDCl}_3$ )

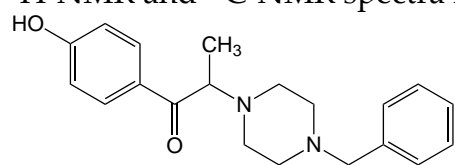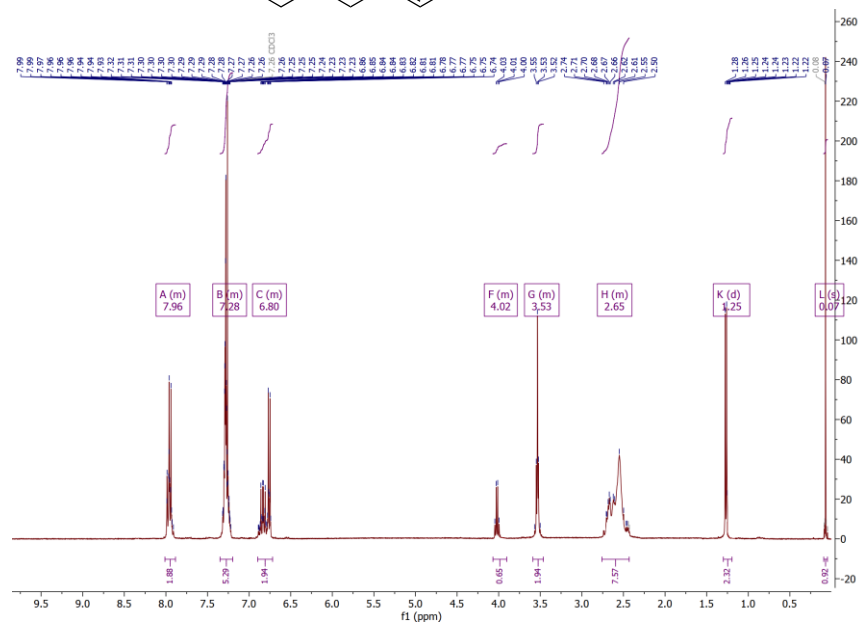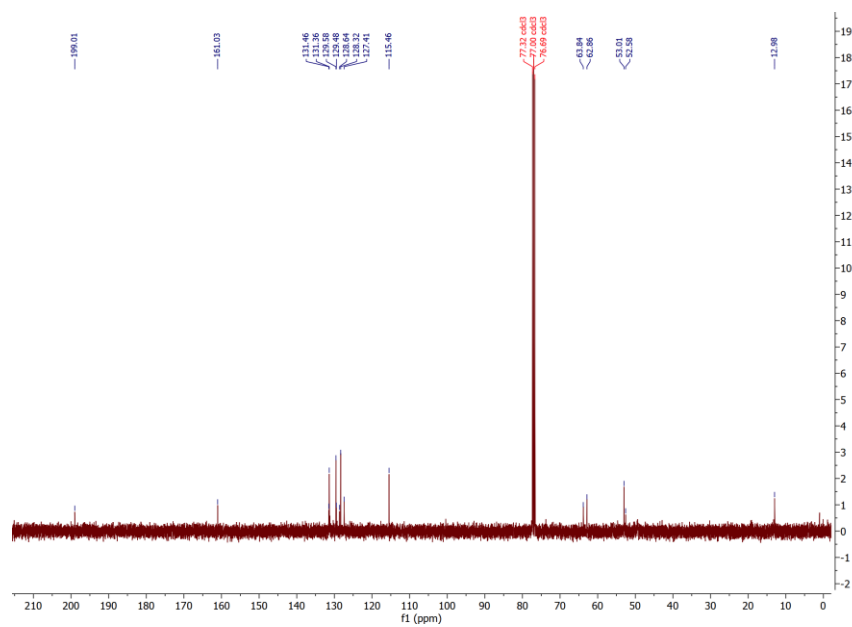

$^1\text{H}$ -NMR and  $^{13}\text{C}$ -NMR spectra for compound **51** ( $\text{CDCl}_3$ )

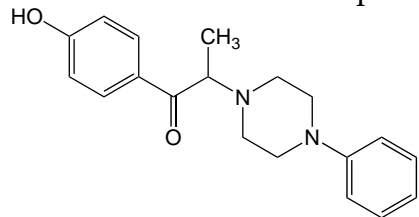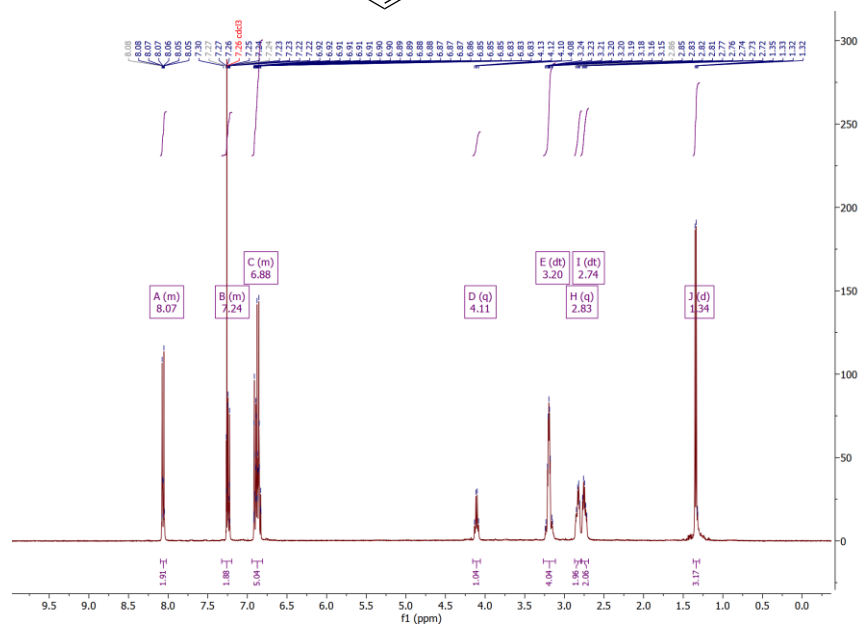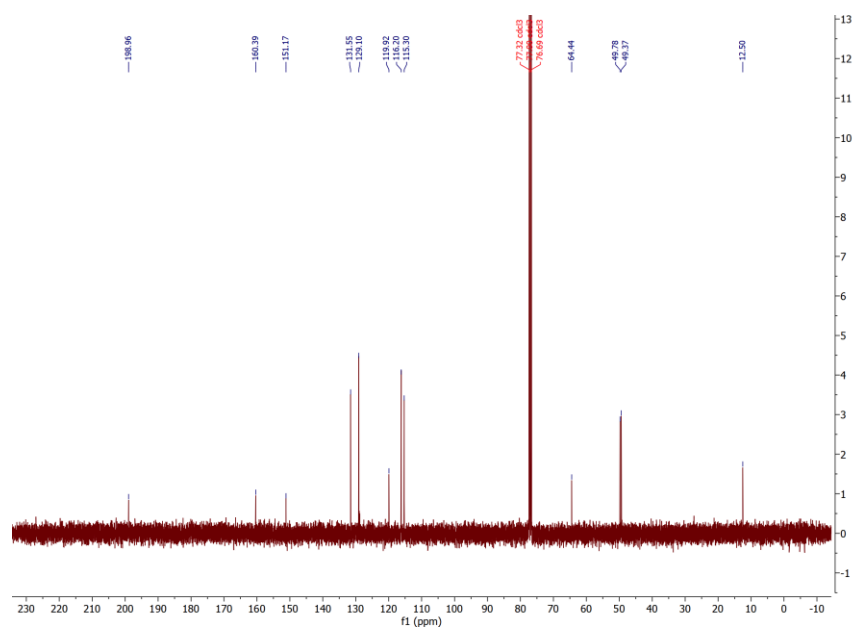

$^1\text{H}$ -NMR and  $^{13}\text{C}$ -NMR spectra for compound **5m** ( $\text{CDCl}_3$ )

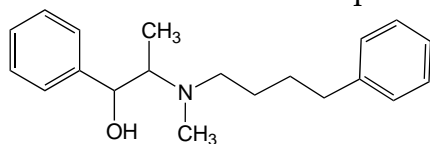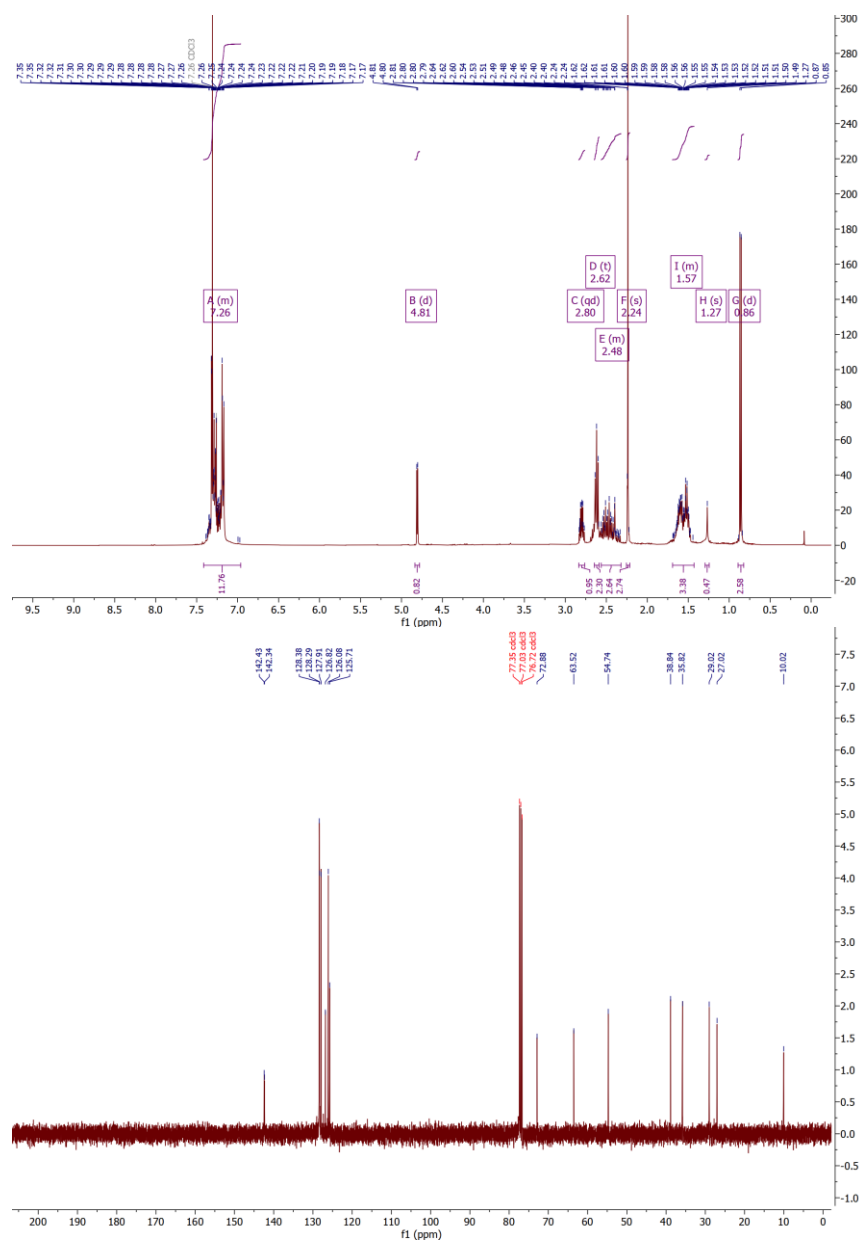

$^1\text{H}$ -NMR and  $^{13}\text{C}$ -NMR spectra for compound **5n** ( $\text{CDCl}_3$ )

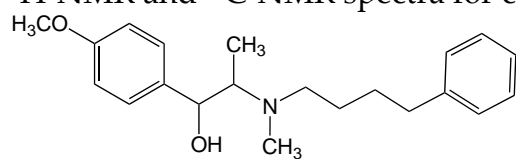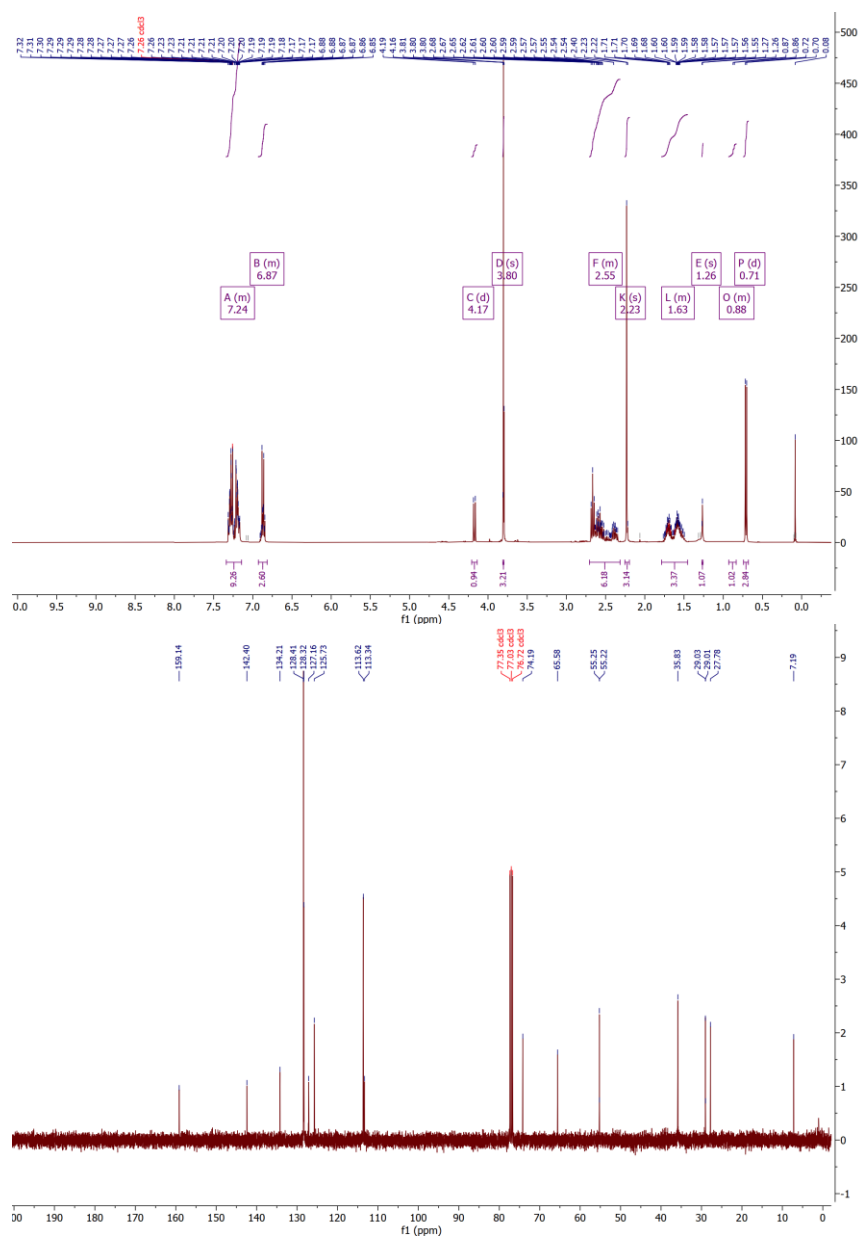

$^1\text{H}$ -NMR and  $^{13}\text{C}$ -NMR spectra for compound **5o** ( $\text{CDCl}_3$ )

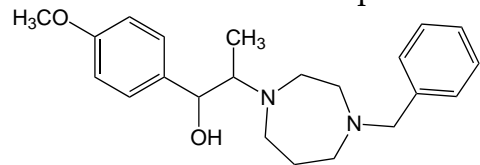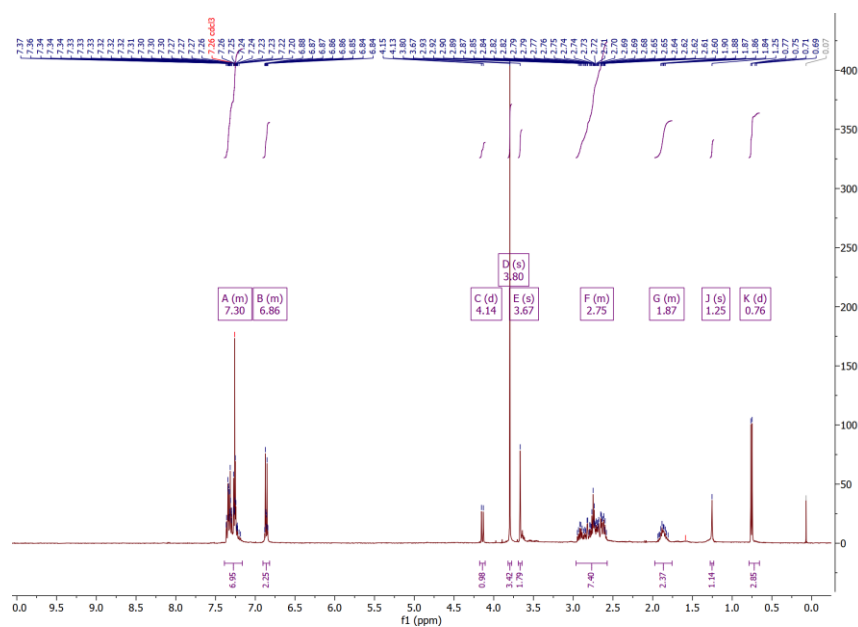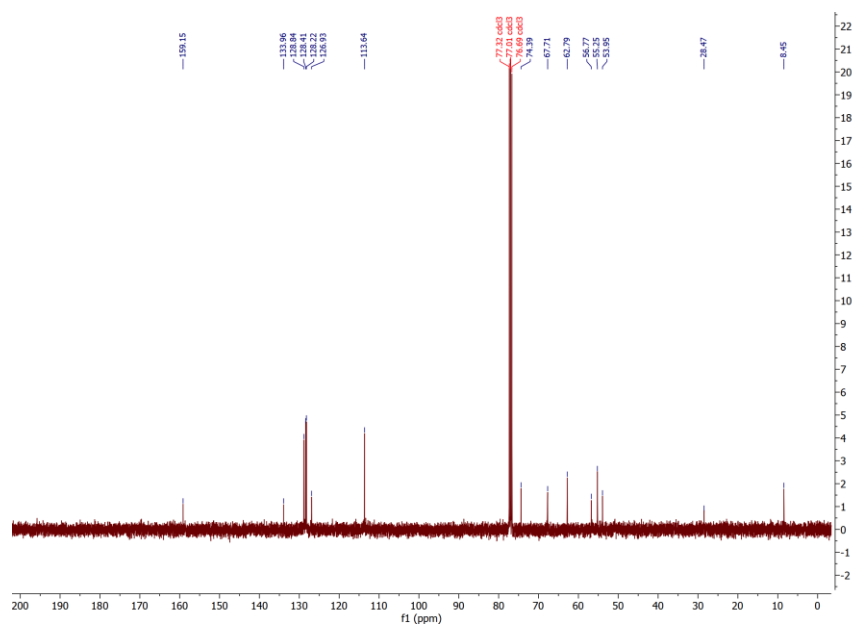



**Figure S1.** Competition curves for compounds **5e**, **5i**, **5d**, **5o**, **5h** and **5k** in comparison with Haloperidol, NE100 and Siramesine.

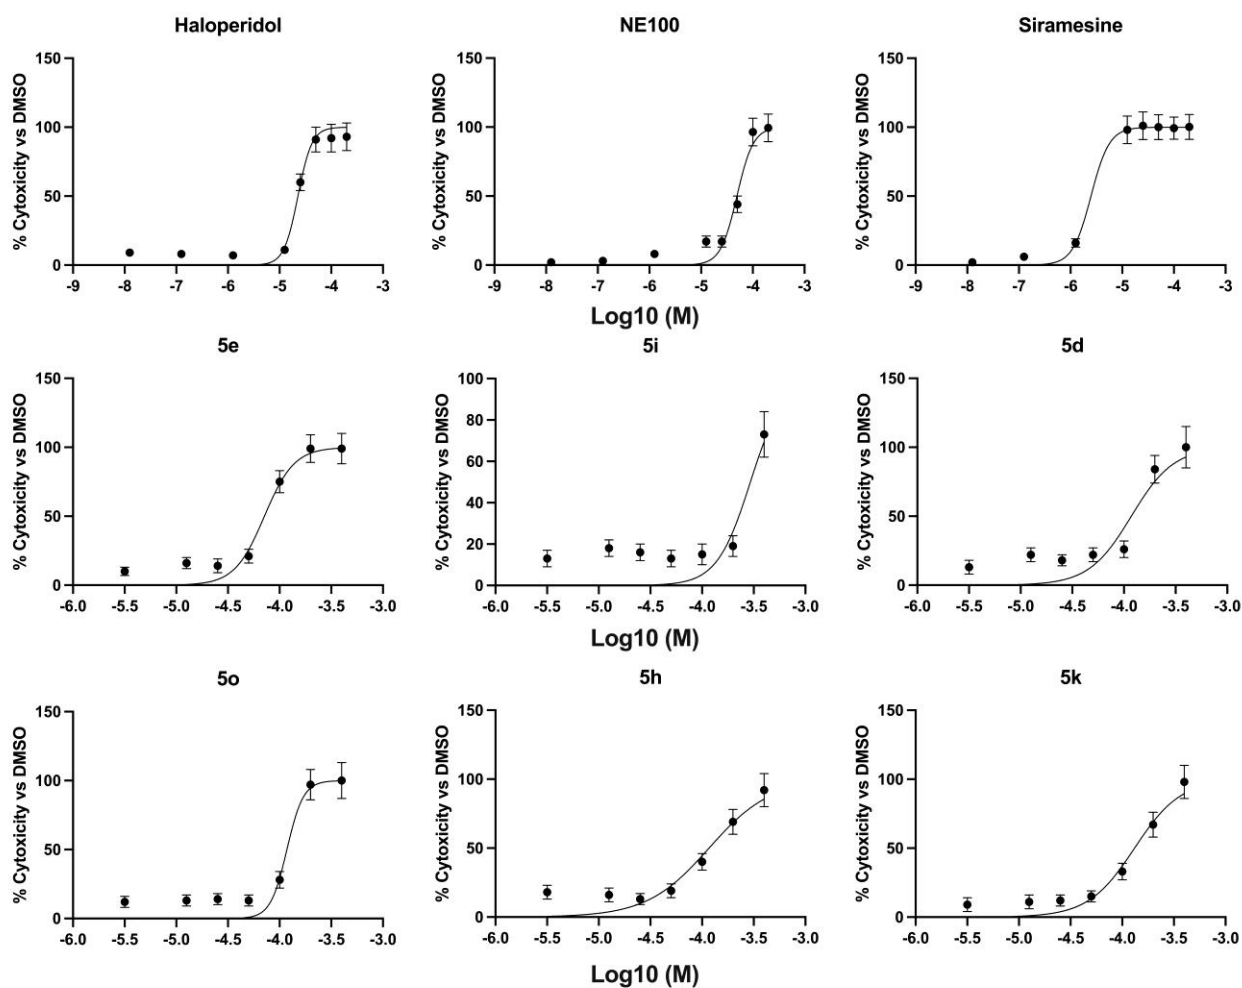

Supplement: s1 [file s1]
